# Supplementary material
Source: PubMed Central journal article supplement (PMC8440494)
Supplement: NIHMS1730096-supplement-1.pdf [file NIHMS1730096-supplement-1.pdf]

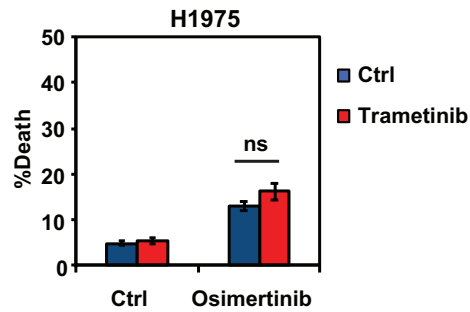

**Figure S1. Related to Figure 1. Trametinib has a minimal impact on osimertinib-induced apoptosis.** H1975 cells were treated with the indicated agents (2  $\mu$ M) for 48 h. Cell death was quantified by annexin-V staining (mean  $\pm$  s.d., n=3).

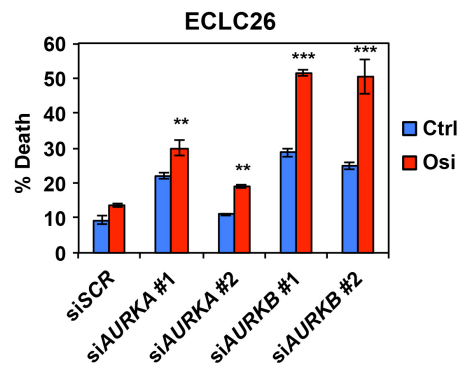

**Figure S2. Related to Figure 2. KD of *AURKB* has a greater impact than KD of *AURKA* on osimertinib-induced apoptosis.** ECLC26 cells transfected with the indicated siRNAs for 24 h were treated with vehicle or osimertinib (2  $\mu$ M) for 24 h. Cell death was quantified by annexin-V staining (mean  $\pm$  s.d., n=3). \*\*,  $P < 0.01$ ; \*\*\*,  $P < 0.001$  (Student's *t*-test).

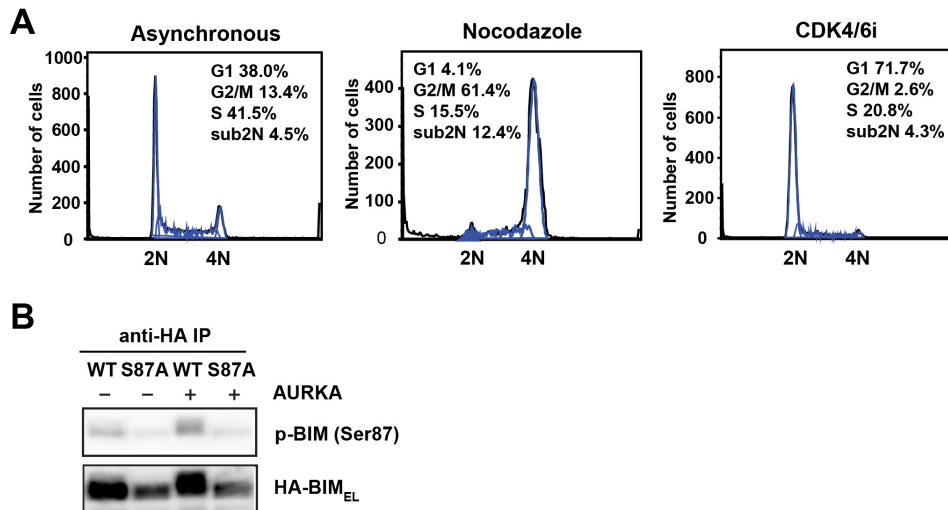

**Figure S3. Related to Figure 3. Cell cycle profiling and *in vitro* AURKA kinase assays.** (A) H1975 cells treated with nocodazole for 16 h or palbociclib for 24 h were subjected to cell-cycle analysis using propidium iodide staining. Cell-cycle phase distribution was quantified by the FlowJo software. (B) The *BAX*<sup>-/-</sup>*BAK*<sup>-/-</sup> H1975 cells stably expressing HA-tagged WT BIM or BIM S87A mutant as described in Figure 3G were treated with palbociclib (1  $\mu$ M) for 24 h and subjected to anti-HA immunoprecipitation. The immunoprecipitates were incubated with recombinant Aurora A kinase in the presence of ATP. The kinase reaction products were assessed by immunoblots using antibodies against p-BIM on Ser87 or BIM.

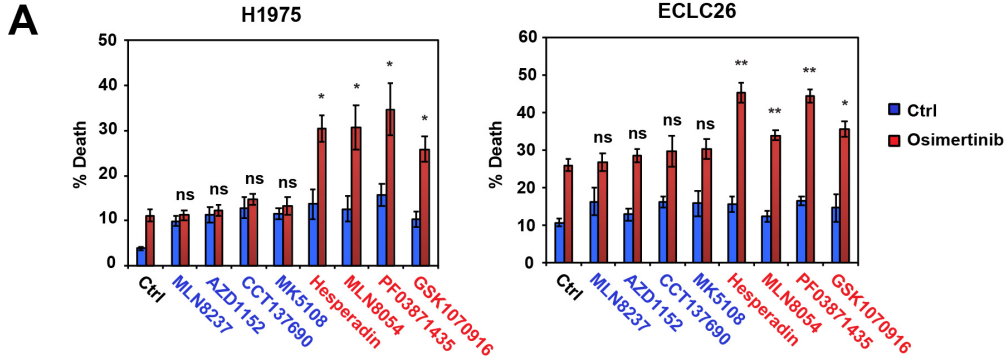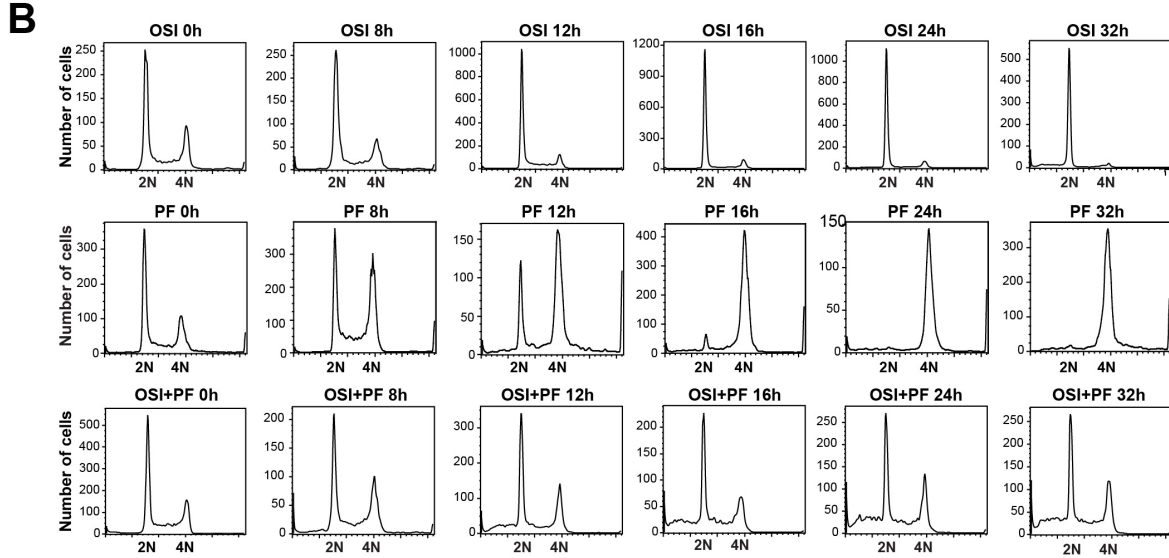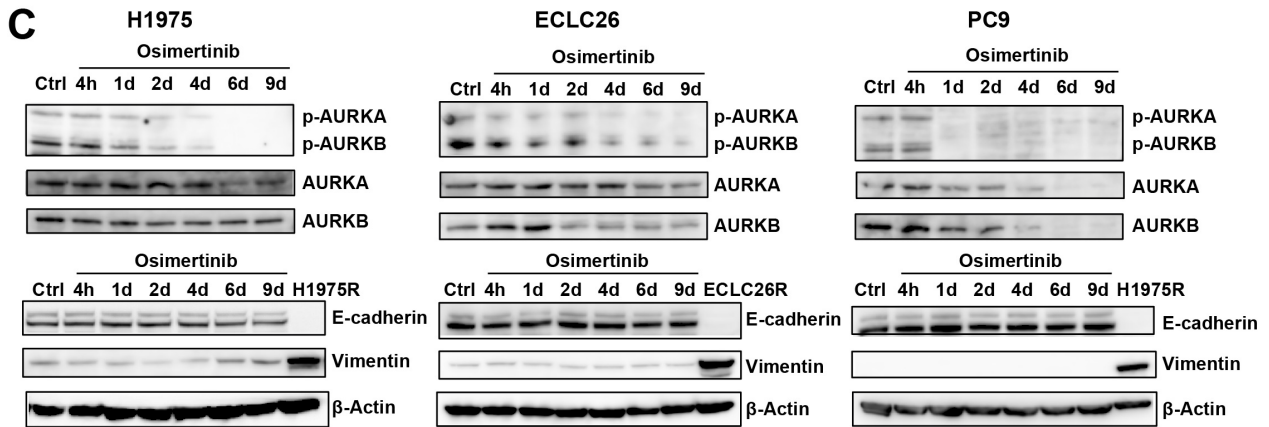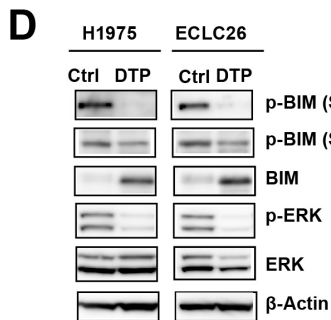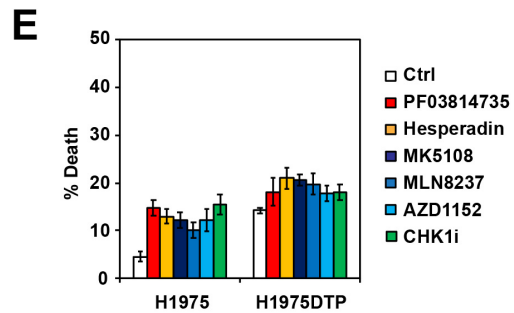

**Figure S4. Related to Figure 4. Cell death, cell cycle, and immunoblot analyses.** (A) H1975 and ECLC26 cells were treated with the indicated Aurora kinase inhibitors (0.5  $\mu\text{M}$ )  $\pm$  osimertinib (2  $\mu\text{M}$ ) for 48 h. Cell death was quantified by annexin-V staining (mean  $\pm$  s.d., n=3). \*,  $P<0.05$ ; \*\*,  $P<0.01$  (Student's *t*-test). (B) H1975 cells were treated with osimertinib (1  $\mu\text{M}$ ) and/or PF03814735 (1  $\mu\text{M}$ ) and subjected to cell-cycle analysis using propidium iodide staining at the indicated times. Cell-cycle phase distribution was quantified by the FlowJo software. (C) H1975, ECLC26, and PC9 cells treated with osimertinib (1  $\mu\text{M}$ ) for the indicated times were subjected to immunoblot analyses. (D) H1975, ECLC26, and drug-tolerant persisters (DTPs) of H1975 or ECLC26 following osimertinib (1  $\mu\text{M}$ ) treatment for 9 days were subjected to immunoblot analyses. (E) H1975 and H1975DTP cells were treated with the indicated agents (0.5 $\mu\text{M}$ ) for 48h. Cell death was quantified by annexin-V staining (mean  $\pm$  s.d., n=3).

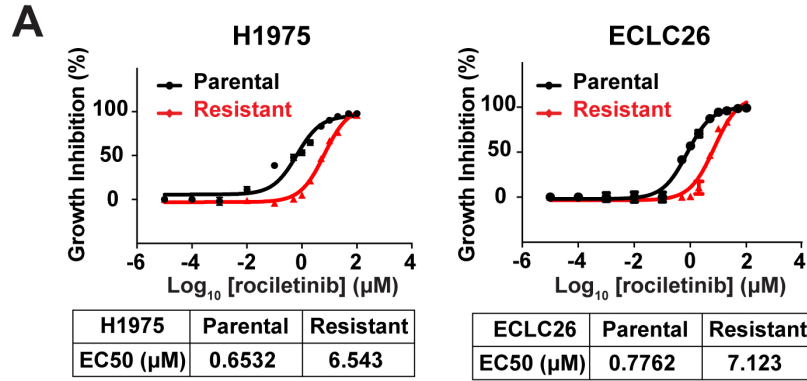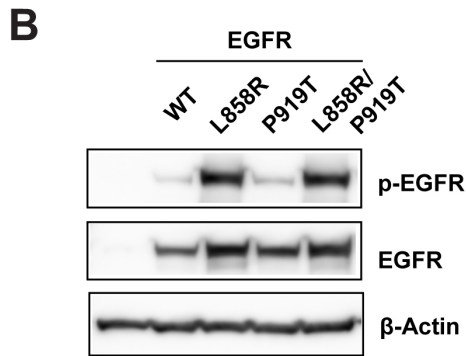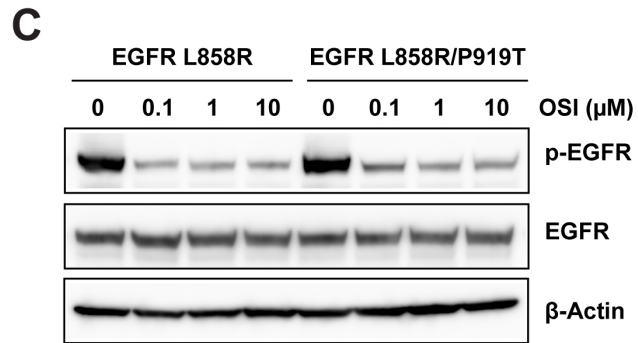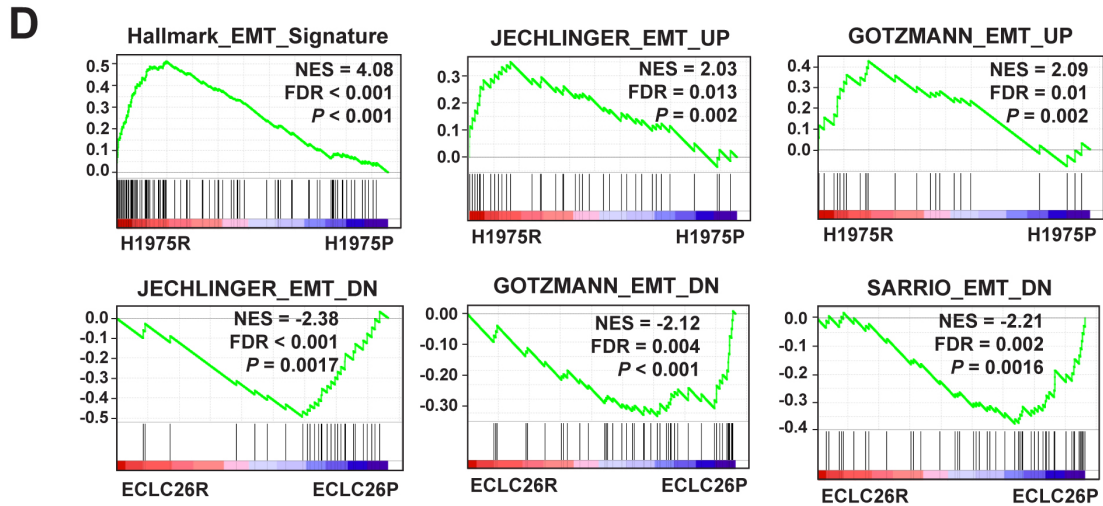

**E**

| Compound    | Target             | H1975P    | H1975R    | Ratio       | ECLC26P   | ECLC26R   | Ratio        |
|-------------|--------------------|-----------|-----------|-------------|-----------|-----------|--------------|
|             |                    | EC50 (µM) | EC50 (µM) |             | EC50 (µM) | EC50 (µM) |              |
| PF03814735  | Aurora kinase      | 2.27      | 0.93      | <b>2.45</b> | 34.10     | 2.53      | <b>13.47</b> |
| MLN8054     | Aurora kinase      | 6.07      | 1.05      | <b>5.78</b> | 12.25     | 2.68      | <b>4.57</b>  |
| GSK1838705A | IGF1R              | 5.82      | 4.28      | <b>1.36</b> | 9.99      | 5.20      | <b>1.92</b>  |
| NVP-AEW541  | IGF1R              | 7.95      | 5.31      | <b>1.50</b> | 5.37      | 3.10      | <b>1.73</b>  |
| Rebastinib  | SRC family kinases | 2.13      | 2.17      | <b>0.98</b> | 2.42      | 0.87      | <b>2.80</b>  |
| Sarcatinib  | SRC family kinases | 20.15     | 16.70     | <b>1.21</b> | 0.43      | 10.61     | <b>0.04</b>  |

**Figure S5. Related to Figure 5. Comparison of parental and osimertinib-resistant H1975 or ECLC26 cells.** (A) The parental as well as osimertinib-resistant H1975 and ECLC26 cells were treated with rociletinib at the indicated concentrations. Cell viability was assessed by CellTiter-Glo assays at 72 h and EC50 was calculated. (B) EGFR P919T is not an activating mutation. NIH3T3 cells transduced with control retrovirus or retrovirus expressing wild-type EGFR, EGFR L858R, EGFR P919T, or EGFR L858R/P919T were assessed by immunoblot analyses. (C) EGFR P919T does not confer resistance to osimertinib. NIH3T3 cells transduced with retrovirus expressing EGFR L858R or EGFR L858R/P919T were treated with the indicated concentrations of osimertinib for 2h and assessed by immunoblot analyses. (D) GSEA plots of the differentially expressed genes (FDR < 0.05) comparing parental with osimertinib-resistant H1975 or ECLC26 cells using the indicated EMT signatures. (E) Summary of EC50 of the indicated agents in the parental as well as osimertinib-resistant H1975 and ECLC26 cells. The ratio of EC50 in the parental cells compared to that of osimertinib-resistant cells was calculated.

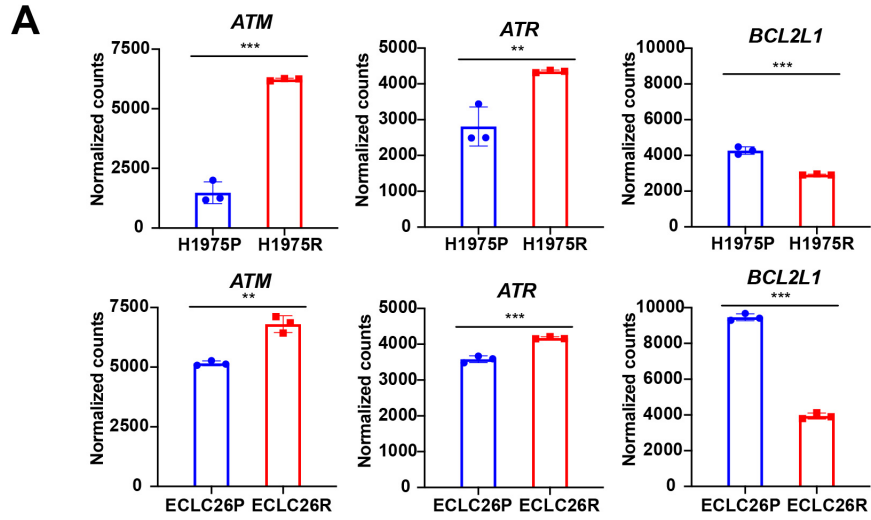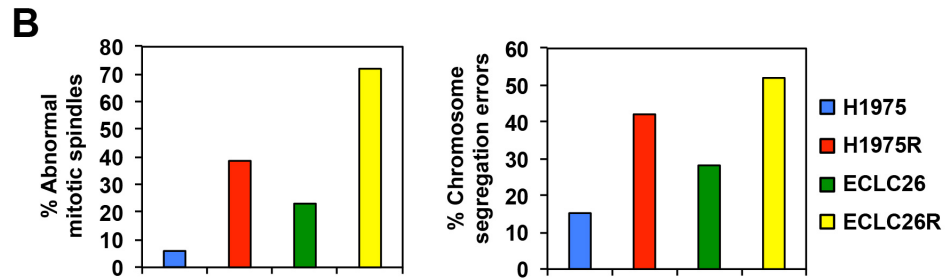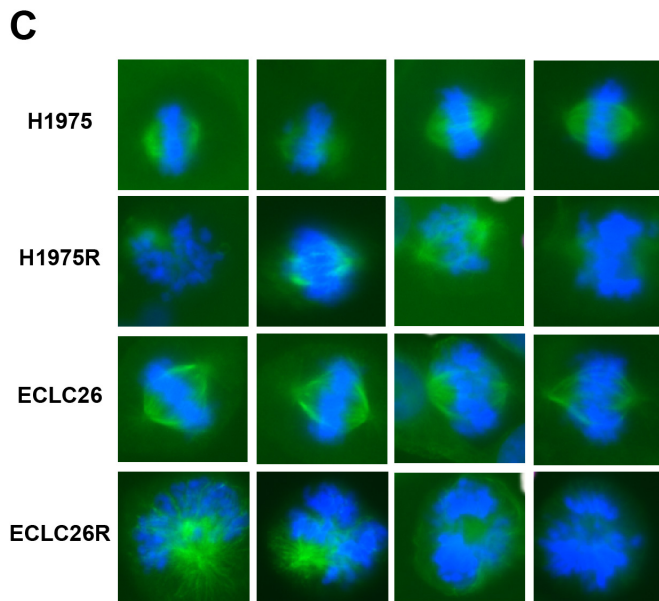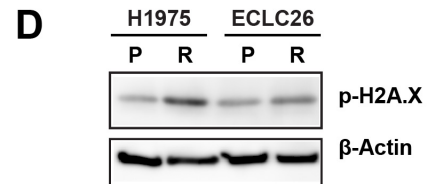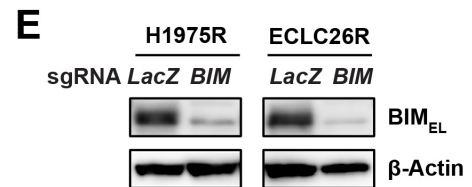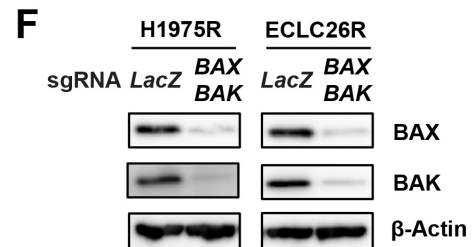

**Figure S6. Related to Figure 6. Analyses of RNA-seq and mitotic defects comparing osimertinib-resistant H1975 or ECLC26 cells with their parental counterparts.** (A) Analysis of RNA-seq data shows upregulation of *ATM* and *ATR* and downregulation of *BCL-X<sub>L</sub>* in both H1975R and ECLC26R cells compared to their parental counterparts (H1975P and ECLC26P). (B) Assessment of mitotic defects based on  $\alpha$ -tubulin (microtubules) immunostaining in the indicated cell lines. Shown are the percentage of counted cells ( $n \geq 50$ ) with abnormal microtubule spindle geometry and chromosome segregation errors. (C) Representative immunofluorescence images from two independent experiments in the indicated cell lines. Green,  $\alpha$ -tubulin immunostaining; blue, Hoechst staining of DNA. (D) The indicated cells were assessed by immunoblots. (E) H1975R and ECLC26R cells transduced with lentivirus expressing sgRNAs targeting *LacZ* or *BIM* were subjected to immunoblot analyses. (F) H1975R and ECLC26R cells transduced with lentivirus expressing sgRNAs targeting *LacZ* or *BAX* and *BAK* were subjected to immunoblot analyses.



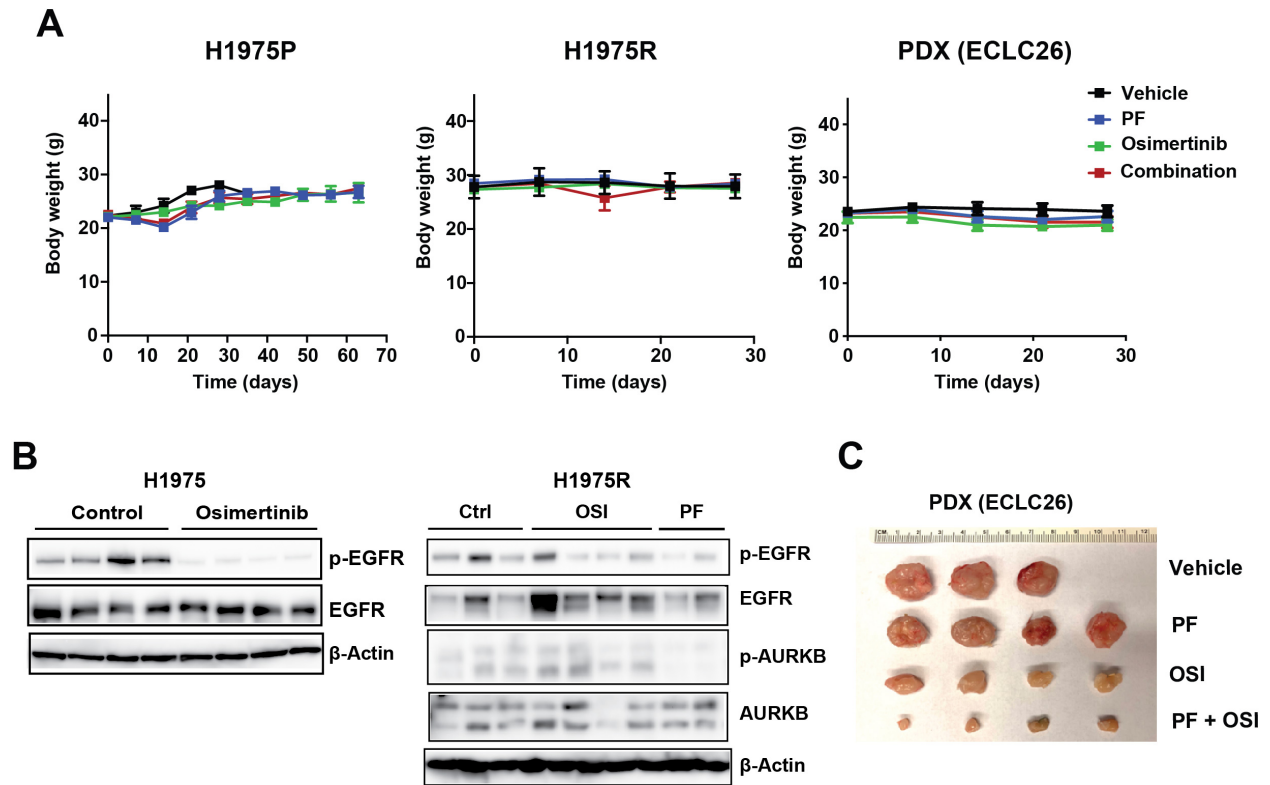

**Figure S7. Related to Figure 7. *EGFR*-mutant lung cancer xenograft studies.** (A) Changes in body weight for mice bearing xenografts derived from H1975P or H1975R as well as patient-derived xenografts (ECLC26) treated with vehicle, osimertinib (5 mg/kg), PF03814735 (20 mg/kg), or the combination. (B) Immunoblot analyses of lysates from H1975 or H1975R xenograft tumors harvested following the treatment with the indicated agents. (C) Representative gross images of patient-derived xenograft tumors from mice treated with the indicated agents for 28 days.

**Table S2. Related to Figure 5.** Development of osimertinib resistance in H1975 cells results in upregulation as well as downregulation of several hallmark signatures revealed by GSEA (H: hallmark gene sets).

| NAME                                       | NES    | NOM p-val | FDR q-val |
|--------------------------------------------|--------|-----------|-----------|
| HALLMARK_EPITHELIAL_MESENCHYMAL_TRANSITION | 4.079  | 0.000     | 0.000     |
| HALLMARK_UV_RESPONSE_DN                    | 2.607  | 0.000     | 0.000     |
| HALLMARK_ANGIOGENESIS                      | 2.120  | 0.002     | 0.005     |
| HALLMARK_MYOGENESIS                        | 1.886  | 0.000     | 0.017     |
| HALLMARK_INTERFERON_ALPHA_RESPONSE         | -2.307 | 0.000     | 0.001     |
| HALLMARK_INTERFERON_GAMMA_RESPONSE         | -2.250 | 0.000     | 0.001     |
| HALLMARK_ESTROGEN_RESPONSE_EARLY           | -2.156 | 0.000     | 0.002     |
| HALLMARK_KRAS_SIGNALING_UP                 | -2.101 | 0.000     | 0.003     |
| HALLMARK_ESTROGEN_RESPONSE_LATE            | -1.905 | 0.000     | 0.021     |
| HALLMARK_APICAL_JUNCTION                   | -1.905 | 0.003     | 0.018     |
| HALLMARK_APICAL_SURFACE                    | -1.838 | 0.011     | 0.024     |
| HALLMARK_E2F_TARGETS                       | -1.798 | 0.005     | 0.028     |
| HALLMARK_ALLOGRAFT_REJECTION               | -1.771 | 0.007     | 0.030     |
| HALLMARK_GLYCOLYSIS                        | -1.683 | 0.015     | 0.050     |
| HALLMARK_KRAS_SIGNALING_DN                 | -1.598 | 0.029     | 0.081     |
| HALLMARK_ANDROGEN_RESPONSE                 | -1.591 | 0.049     | 0.076     |
| HALLMARK_MYC_TARGETS_V1                    | -1.536 | 0.050     | 0.091     |

**Table S3. Related to Figure 6.** Analysis of correlations between mRNA levels of the indicated genes from *EGFR*-mutant LUAD in TCGA (n = 25). R, Pearson correlation coefficient; FDR *q*-value by the Benjamini-Hochberg method.

***EGFR*-mt LUAD (N=25), R/*q*-value**

|      | FOXA1        | FOXA2        | ZEB1               | ZEB2               |
|------|--------------|--------------|--------------------|--------------------|
| ATR  | 0.071/0.368  | -0.066/0.378 | 0.275/0.092        | <b>0.591/0.001</b> |
| ATM  | 0.065/0.379  | -0.068/0.374 | -0.011/0.480       | 0.127/0.273        |
| VIM  | -0.286/0.083 | -0.209/0.158 | <b>0.558/0.002</b> | <b>0.383/0.029</b> |
| CDH1 | -0.057/0.393 | 0.319/0.060  | -0.001/0.499       | -0.183/0.190       |

**Table S4. Related to Figure 6.** Analysis of correlations between mRNA levels of the indicated genes from TCGA-LUAC cohort (n = 230). R, Pearson correlation coefficient; FDR *q*-value by the Benjamini-Hochberg method.

**LUAD (N=230), R/*q*-value**

|      | FOXA1                  | FOXA2               | ZEB1                  | ZEB2                  |
|------|------------------------|---------------------|-----------------------|-----------------------|
| ATR  | 0.065/0.481            | <b>-0.175/0.025</b> | 0.137/0.092           | <b>0.213/4.953e-3</b> |
| ATM  | -0.037/0.687           | -0.047/0.600        | <b>0.365/1.36e-7</b>  | <b>0.452/2.00e-11</b> |
| VIM  | <b>-0.273/1.784e-4</b> | -0.101/0.227        | <b>0.548/6.37e-17</b> | <b>0.524/2.14e-15</b> |
| CDH1 | 0.165/0.892            | 0.090/0.351         | 0.054/0.607           | 0.021/0.862           |

**Table S5. Related to Figure 7.** Summary of mutations detected by MSK-IMPACT assays comparing pre-treatment *EGFR*-mutant lung tumors and the corresponding patient-derived xenografts derived during disease progression under osimertinib treatment.

| <b>Ru813c patient's metastatic tumor</b> |                      |                          |                   |                   |
|------------------------------------------|----------------------|--------------------------|-------------------|-------------------|
| <b>HUGO_Symbol</b>                       | <b>Variant_Class</b> | <b>Amino_Acid_Change</b> | <b>T_Alt_Freq</b> | <b>T_Coverage</b> |
| EGFR                                     | In_Frame_Del         | E746_S752delinsV         | 0.12              | 483               |
| NF2                                      | Nonsense_Mutation    | Q125*                    | 0.14              | 428               |
| ATM                                      | Missense_Mutation    | G134D                    | 0.11              | 274               |
| RARA                                     | Missense_Mutation    | F310V                    | 0.09              | 558               |
| <b>Ru813c PDX</b>                        |                      |                          |                   |                   |
| <b>HUGO_Symbol</b>                       | <b>Variant_Class</b> | <b>Amino_Acid_Change</b> | <b>T_Alt_Freq</b> | <b>T_Coverage</b> |
| EGFR                                     | In_Frame_Del         | E746_S752delinsV         | 0.57              | 521               |
| NF2                                      | Nonsense_Mutation    | Q125*                    | 1                 | 275               |
| RARA                                     | Missense_Mutation    | F310V                    | 0.49              | 1187              |
| <b>Lx1114 patient's primary tumor</b>    |                      |                          |                   |                   |
| <b>HUGO_Symbol</b>                       | <b>Variant_Class</b> | <b>Amino_Acid_Change</b> | <b>T_Alt_Freq</b> | <b>T_Coverage</b> |
| EGFR                                     | In_Frame_Del         | E746_A750del             | 0.88              | 3945              |
| TP53                                     | Missense_Mutation    | R280G                    | 0.24              | 756               |
| CCND2                                    | Missense_Mutation    | H162Y                    | 0.21              | 590               |
| EPHA5                                    | Missense_Mutation    | E754Q                    | 0.25              | 332               |
| <b>Lx1114 PDX</b>                        |                      |                          |                   |                   |
| <b>HUGO_Symbol</b>                       | <b>Variant_Class</b> | <b>Amino_Acid_Change</b> | <b>T_Alt_Freq</b> | <b>T_Coverage</b> |
| EGFR                                     | In_Frame_Del         | E746_A750del             | 0.97              | 3953              |
| TP53                                     | Missense_Mutation    | R280G                    | 1                 | 444               |
| KEAP1                                    | Missense_Mutation    | p.G509R                  | 0.95              | 396               |
| CCND2                                    | Missense_Mutation    | H162Y                    | 0.99              | 212               |
| RTEL1                                    | Missense_Mutation    | p.V271M                  | 0.52              | 486               |
